# Supplementary material for: Onset of Alzheimer disease in apolipoprotein ɛ4 carriers is earlier in butyrylcholinesterase K variant carriers
Source: bioRxiv or medRxiv preprint supplement (doi:10.1101/2024.01.02.24300718), 2024-01-03
Supplement: Supplementary file [file media-1.pdf]

Table S1. Mild AD phenotype across genotype groups defined by *BCHE-K* allele frequency.

| Variable     |                                                 |                           | 2 <i>BCHE-K</i> & 1 <i>BCHE-K</i><br>(n=16) | 2 <i>BCHE-K</i><br>(n=3)      | 1 <i>BCHE-K</i><br>(n=13)     | No <i>BCHE-K</i><br>(n=29)    |
|--------------|-------------------------------------------------|---------------------------|---------------------------------------------|-------------------------------|-------------------------------|-------------------------------|
| Sex          | Female                                          |                           | 9<br>(56.3%)                                | 2<br>(66.7%)                  | 7<br>(53.8%)                  | 13<br>(44.8%)                 |
|              | Male                                            |                           | 7<br>(43.8%)                                | 1<br>(33.3%)                  | 6<br>(46.2%)                  | 16<br>(55.2%)                 |
| Onset of AD  | Age-at-diagnosis<br>(yrs)                       | <b>Mean<br/>(SD, SEM)</b> | <b>61.63<br/>(6.51, 1.63)</b>               | <b>59.37<br/>(5.44, 3.14)</b> | <b>62.16<br/>(6.82, 1.89)</b> | <b>66.02<br/>(5.30, 0.98)</b> |
|              |                                                 | Median<br>(P25, P75)      | 61.58<br>(56.64, 66.08)                     | 57.92<br>(54.80, 65.39)       | 61.89<br>(56.69, 66.33)       | 66.48<br>(63.10, 70.23)       |
|              |                                                 | (Min, Max)                | (49.04, 74.13)                              | (54.80, 65.39)                | (49.04, 74.13)                | (47.99, 72.79)                |
|              | Age-at-baseline<br>(yrs)                        | <b>Mean<br/>(SD, SEM)</b> | <b>62.9<br/>(6.2, 1.6)</b>                  | <b>60.0<br/>(5.6, 3.2)</b>    | <b>63.6<br/>(6.4, 1.8)</b>    | <b>67.4<br/>(4.9, 0.9)</b>    |
|              |                                                 | Median<br>(P25, P75)      | 63.0<br>(59.0, 67.5)                        | 59.0<br>(55.0, 66.0)          | 63.0<br>(59.0, 68.0)          | 67.0<br>(66.0, 71.0)          |
|              |                                                 | (Min, Max)                | (50.0, 74.0)                                | (55.0, 66.0)                  | (50.0, 74.0)                  | (52.0, 74.0)                  |
|              | Time since AD diagnosis at<br>baseline<br>(yrs) | <b>Mean<br/>(SD, SEM)</b> | <b>1.30<br/>(1.18, 0.29)</b>                | <b>0.63<br/>(0.44, 0.25)</b>  | <b>1.46<br/>(1.25, 0.35)</b>  | <b>1.36<br/>(1.38, 0.26)</b>  |
|              |                                                 | Median<br>(P25, P75)      | 1.02<br>(0.59, 1.88)                        | 0.61<br>(0.20, 1.08)          | 1.11<br>(0.67, 2.17)          | 1.36<br>(0.21, 2.37)          |
|              |                                                 | (Min, Max)                | (-0.13, 4.37)                               | (0.20, 1.08)                  | (-0.13, 4.37)                 | (-1.04, 4.01)                 |
| Neuroimaging | Hippocampal vol., % of ICV                      | <b>Mean<br/>(SD, SEM)</b> | <b>0.27<br/>(0.04, 0.01)</b>                | <b>0.27<br/>(0.02, 0.01)</b>  | <b>0.27<br/>(0.04, 0.01)</b>  | <b>0.25<br/>(0.04, 0.01)</b>  |
|              |                                                 | Median<br>(P25, P75)      | 0.27<br>(0.26, 0.29)                        | 0.27<br>(0.25, 0.29)          | 0.27<br>(0.27, 0.29)          | 0.24<br>(0.22, 0.27)          |
|              |                                                 | (Min, Max)                | (0.17, 0.33)                                | (0.25, 0.29)                  | (0.17, 0.33)                  | (0.19, 0.34)                  |
|              | Ventricular vol., % of ICV                      | <b>Mean<br/>(SD, SEM)</b> | <b>2.72<br/>(1.38, 0.35)</b>                | <b>1.84<br/>(0.76, 0.44)</b>  | <b>2.93<br/>(1.43, 0.40)</b>  | <b>2.82<br/>(1.19, 0.22)</b>  |
|              |                                                 | Median<br>(P25, P75)      | 2.38<br>(1.81, 3.58)                        | 1.75<br>(1.12, 2.65)          | 2.80<br>(2.00, 3.86)          | 2.67<br>(1.94, 3.49)          |
|              |                                                 | (Min, Max)                | (1.07, 6.20)                                | (1.12, 2.65)                  | (1.07, 6.20)                  | (1.02, 5.11)                  |
| CSF markers  | Aβ <sub>40</sub> , pg/mL                        | <b>Mean<br/>(SD, SEM)</b> | <b>17.44<br/>(3.95, 0.99)</b>               | <b>18.60<br/>(4.28, 2.47)</b> | <b>17.18<br/>(4.01, 1.11)</b> | <b>18.20<br/>(4.46, 0.83)</b> |

| Variable                                   |                           | 2 BCHE-K & 1 BCHE-K<br>(n=16)          | 2 BCHE-K<br>(n=3)                      | 1 BCHE-K<br>(n=13)                     | No BCHE-K<br>(n=29)                   |
|--------------------------------------------|---------------------------|----------------------------------------|----------------------------------------|----------------------------------------|---------------------------------------|
| Aβ <sub>42</sub> , pg/mL                   | Median<br>(P25, P75)      | 16.76<br>(14.66, 20.76)                | 16.56<br>(15.73, 23.52)                | 16.96<br>(14.65, 20.52)                | 17.68<br>(16.31, 19.42)               |
|                                            | (Min, Max)                | (9.95, 23.52)                          | (15.73, 23.52)                         | (9.95, 22.74)                          | (10.73, 28.40)                        |
|                                            | <b>Mean<br/>(SD, SEM)</b> | <b>676.1<br/>(160.9, 40.2)</b>         | <b>657.3<br/>(220.2, 127.1)</b>        | <b>680.5<br/>(155.5, 43.1)</b>         | <b>713.2<br/>(198.1, 36.8)</b>        |
| Aβ <sub>42</sub> to Aβ <sub>40</sub> ratio | Median<br>(P25, P75)      | 653.5<br>(570.1, 805.0)                | 675.8<br>(428.5, 867.7)                | 642.3<br>(572.0, 804.8)                | 687.1<br>(592.2, 864.6)               |
|                                            | (Min, Max)                | (428.5, 1039.0)                        | (428.5, 867.7)                         | (491.4, 1039.0)                        | (340.4, 1126.0)                       |
|                                            | <b>Mean<br/>(SD, SEM)</b> | <b>0.0400<br/>(0.0075, 0.0019)</b>     | <b>0.0364<br/>(0.0102, 0.0059)</b>     | <b>0.0409<br/>(0.0071, 0.0020)</b>     | <b>0.0389<br/>(0.0075, 0.0014)</b>    |
| Total-tau                                  | Median<br>(P25, P75)      | 0.0423<br>(0.0342, 0.0462)             | 0.0370<br>(0.0259, 0.0463)             | 0.0438<br>(0.0344, 0.0461)             | 0.0385<br>(0.0335, 0.0446)            |
|                                            | (Min, Max)                | (0.0259, 0.0504)                       | (0.0259, 0.0463)                       | (0.0287, 0.0504)                       | (0.0255, 0.0517)                      |
|                                            | <b>Mean<br/>(SD, SEM)</b> | <b>398.16<br/>(108.96, 27.24)</b>      | <b>405.18<br/>(139.05, 80.28)</b>      | <b>396.53<br/>(107.72, 29.88)</b>      | <b>399.13<br/>(141.17, 26.22)</b>     |
| p-tau <sub>181</sub> , pg/mL               | Median<br>(P25, P75)      | 388.45<br>(304.88, 480.70)             | 330.95<br>(319.00, 565.60)             | 405.60<br>(290.75, 464.70)             | 345.10<br>(313.45, 454.90)            |
|                                            | (Min, Max)                | (221.05, 565.60)                       | (319.00, 565.60)                       | (221.05, 556.10)                       | (212.00, 811.75)                      |
|                                            | <b>Mean<br/>(SD, SEM)</b> | <b>41.06<br/>(12.91, 3.23)</b>         | <b>41.95<br/>(13.93, 8.05)</b>         | <b>40.85<br/>(13.25, 3.68)</b>         | <b>39.11<br/>(14.30, 2.65)</b>        |
| NfL, pg/mL                                 | Median<br>(P25, P75)      | 38.96<br>(31.52, 51.20)                | 36.07<br>(31.91, 57.86)                | 39.36<br>(31.12, 48.31)                | 35.57<br>(30.29, 44.83)               |
|                                            | (Min, Max)                | (19.71, 63.98)                         | (31.91, 57.86)                         | (19.71, 63.98)                         | (20.55, 81.28)                        |
|                                            | <b>Mean<br/>(SD, SEM)</b> | <b>1368.151<br/>(416.737, 104.184)</b> | <b>1250.411<br/>(270.156, 155.974)</b> | <b>1395.322<br/>(447.949, 124.239)</b> | <b>1279.087<br/>(395.142, 73.376)</b> |
| Ng, pg/mL                                  | Median<br>(P25, P75)      | 1270.970<br>(1139.410, 1538.598)       | 1213.900<br>(1000.368, 1536.965)       | 1296.260<br>(1167.610, 1540.230)       | 1325.795<br>(999.923, 1564.960)       |
|                                            | (Min, Max)                | (630.833, 2391.810)                    | (1000.368, 1536.965)                   | (630.833, 2391.810)                    | (580.969, 2223.485)                   |
|                                            | <b>Mean<br/>(SD, SEM)</b> | <b>559.330<br/>(199.224, 49.806)</b>   | <b>560.000<br/>(238.627, 137.771)</b>  | <b>559.176<br/>(200.305, 55.555)</b>   | <b>508.231<br/>(250.610, 46.537)</b>  |
| Ng, pg/mL                                  | Median<br>(P25, P75)      | 541.329<br>(392.145, 744.592)          | 538.994<br>(332.570, 808.435)          | 543.664<br>(422.006, 738.869)          | 470.174<br>(315.335, 562.083)         |
|                                            | (Min, Max)                | (237.776, 905.365)                     | (332.570, 808.435)                     | (237.776, 905.365)                     | (194.618, 1306.915)                   |

| Variable         |                                                   | 2 BCHE-K & 1 BCHE-K<br>(n=16) | 2 BCHE-K<br>(n=3)                       | 1 BCHE-K<br>(n=13)                     | No BCHE-K<br>(n=29)                     |                                         |
|------------------|---------------------------------------------------|-------------------------------|-----------------------------------------|----------------------------------------|-----------------------------------------|-----------------------------------------|
|                  | YKL-40, pg/mL                                     | <b>Mean<br/>(SD, SEM)</b>     | <b>279704.0<br/>(152934.4, 38233.6)</b> | <b>226656.3<br/>(75313.2, 43482.1)</b> | <b>291945.8<br/>(165604.8, 45930.5)</b> | <b>258422.6<br/>(109116.7, 20262.5)</b> |
|                  |                                                   | Median<br>(P25, P75)          | 230043.5<br>(147203.5, 382781.8)        | 239378.0<br>(145792.5, 294798.5)       | 220709.0<br>(148614.5, 385381.5)        | 236943.0<br>(202933.5, 300130.5)        |
|                  |                                                   | (Min, Max)                    | (98750.8, 598333.5)                     | (145792.5, 294798.5)                   | (98750.8, 598333.5)                     | (112021.5, 662666.5)                    |
| <b>Cognition</b> | MMSE Total<br>(0-30)                              | <b>Mean<br/>(SD, SEM)</b>     | <b>23.7<br/>(2.4, 0.6)</b>              | <b>22.3<br/>(1.5, 0.9)</b>             | <b>24.0<br/>(2.5, 0.7)</b>              | <b>23.6<br/>(2.2, 0.4)</b>              |
|                  |                                                   | Median<br>(P25, P75)          | 24.5<br>(21.5, 26.0)                    | 22.0<br>(21.0, 24.0)                   | 25.0<br>(22.0, 26.0)                    | 23.0<br>(22.0, 26.0)                    |
|                  |                                                   | (Min, Max)                    | (20.0, 27.0)                            | (21.0, 24.0)                           | (20.0, 27.0)                            | (20.0, 27.0)                            |
|                  | MMSE Memory<br>(0-6)                              | <b>Mean<br/>(SD, SEM)</b>     | <b>4.0<br/>(1.1, 0.3)</b>               | <b>3.3<br/>(0.6, 0.3)</b>              | <b>4.2<br/>(1.1, 0.3)</b>               | <b>4.3<br/>(1.1, 0.2)</b>               |
|                  |                                                   | Median<br>(P25, P75)          | 4.0<br>(3.0, 4.5)                       | 3.0<br>(3.0, 4.0)                      | 4.0<br>(4.0, 5.0)                       | 4.0<br>(3.0, 5.0)                       |
|                  |                                                   | (Min, Max)                    | (2.0, 6.0)                              | (3.0, 4.0)                             | (2.0, 6.0)                              | (3.0, 6.0)                              |
|                  | MMSE Visual Construction<br>(0-1)                 | <b>Mean<br/>(SD, SEM)</b>     | <b>0.8<br/>(0.4, 0.1)</b>               | <b>0.7<br/>(0.6, 0.3)</b>              | <b>0.8<br/>(0.4, 0.1)</b>               | <b>0.6<br/>(0.5, 0.1)</b>               |
|                  |                                                   | Median<br>(P25, P75)          | 1.0<br>(0.5, 1.0)                       | 1.0<br>(0.0, 1.0)                      | 1.0<br>(1.0, 1.0)                       | 1.0<br>(0.0, 1.0)                       |
|                  |                                                   | (Min, Max)                    | (0.0, 1.0)                              | (0.0, 1.0)                             | (0.0, 1.0)                              | (0.0, 1.0)                              |
|                  | RBANS Total<br>(40-160)                           | <b>Mean<br/>(SD, SEM)</b>     | <b>67.5<br/>(11.5, 2.9)</b>             | <b>63.3<br/>(15.6, 9.0)</b>            | <b>68.5<br/>(10.9, 3.0)</b>             | <b>67.1<br/>(12.0, 2.2)</b>             |
|                  |                                                   | Median<br>(P25, P75)          | 71.5<br>(56.0, 77.0)                    | 61.0<br>(49.0, 80.0)                   | 72.0<br>(57.0, 77.0)                    | 66.0<br>(59.0, 76.0)                    |
|                  |                                                   | (Min, Max)                    | (49.0, 82.0)                            | (49.0, 80.0)                           | (51.0, 82.0)                            | (49.0, 90.0)                            |
|                  | RBANS Delayed Memory<br>(40-154)                  | <b>Mean<br/>(SD, SEM)</b>     | <b>57.8<br/>(19.2, 4.8)</b>             | <b>58.7<br/>(22.7, 13.1)</b>           | <b>57.6<br/>(19.4, 5.4)</b>             | <b>51.8<br/>(13.3, 2.5)</b>             |
|                  |                                                   | Median<br>(P25, P75)          | 50.0<br>(44.0, 66.0)                    | 52.0<br>(40.0, 84.0)                   | 48.0<br>(44.0, 64.0)                    | 48.0<br>(44.0, 52.0)                    |
|                  |                                                   | (Min, Max)                    | (40.0, 102.0)                           | (40.0, 84.0)                           | (40.0, 102.0)                           | (40.0, 94.0)                            |
|                  | RBANS Visuospatial/<br>Constructional<br>(40-154) | <b>Mean<br/>(SD, SEM)</b>     | <b>86.9<br/>(24.1, 6.0)</b>             | <b>79.0<br/>(36.4, 21.0)</b>           | <b>88.8<br/>(22.1, 6.1)</b>             | <b>84.2<br/>(20.5, 3.8)</b>             |
|                  |                                                   | Median<br>(P25, P75)          | 78.0                                    | 60.0                                   | 78.0                                    | 84.0                                    |

Onset of Alzheimer disease in apolipoprotein ε4 carriers is earlier in butyrylcholinesterase K variant carriers

| Variable                           |                           | <b>2 BCHE-K &amp; 1 BCHE-K<br/>(n=16)</b> | <b>2 BCHE-K<br/>(n=3)</b>    | <b>1 BCHE-K<br/>(n=13)</b>  | <b>No BCHE-K<br/>(n=29)</b> |
|------------------------------------|---------------------------|-------------------------------------------|------------------------------|-----------------------------|-----------------------------|
|                                    |                           | (64.0, 105.0)                             | (56.0, 121.0)                | (72.0, 105.0)               | (64.0, 102.0)               |
|                                    | (Min, Max)                | (56.0, 126.0)                             | (56.0, 121.0)                | (62.0, 126.0)               | (50.0, 121.0)               |
| RBANS Immediate Memory<br>(40-154) | <b>Mean<br/>(SD, SEM)</b> | <b>62.6<br/>(17.0, 4.2)</b>               | <b>60.7<br/>(18.0, 10.4)</b> | <b>63.1<br/>(17.5, 4.9)</b> | <b>68.2<br/>(15.3, 2.8)</b> |
|                                    | Median<br>(P25, P75)      | 63.0<br>(49.0, 73.0)                      | 69.0<br>(40.0, 73.0)         | 57.0<br>(49.0, 73.0)        | 61.0<br>(57.0, 78.0)        |
|                                    | (Min, Max)                | (40.0, 100.0)                             | (40.0, 73.0)                 | (40.0, 100.0)               | (44.0, 103.0)               |
|                                    |                           |                                           |                              |                             |                             |
| RBANS Language<br>(40-154)         | <b>Mean<br/>(SD, SEM)</b> | <b>88.2<br/>(9.2, 2.3)</b>                | <b>91.3<br/>(6.4, 3.7)</b>   | <b>87.5<br/>(9.8, 2.7)</b>  | <b>87.1<br/>(14.0, 2.6)</b> |
|                                    | Median<br>(P25, P75)      | 90.0<br>(82.0, 94.0)                      | 94.0<br>(84.0, 96.0)         | 90.0<br>(82.0, 92.0)        | 92.0<br>(83.0, 96.0)        |
|                                    | (Min, Max)                | (71.0, 108.0)                             | (84.0, 96.0)                 | (71.0, 108.0)               | (51.0, 104.0)               |
|                                    |                           |                                           |                              |                             |                             |
| RBANS Attention<br>(40-154)        | <b>Mean<br/>(SD, SEM)</b> | <b>74.4<br/>(14.4, 3.6)</b>               | <b>58.0<br/>(12.3, 7.1)</b>  | <b>78.2<br/>(12.3, 3.4)</b> | <b>77.7<br/>(15.2, 2.8)</b> |
|                                    | Median<br>(P25, P75)      | 73.5<br>(68.0, 85.0)                      | 53.0<br>(49.0, 72.0)         | 75.0<br>(72.0, 85.0)        | 75.0<br>(64.0, 85.0)        |
|                                    | (Min, Max)                | (49.0, 100.0)                             | (49.0, 72.0)                 | (53.0, 100.0)               | (53.0, 118.0)               |
|                                    |                           |                                           |                              |                             |                             |

ICV, intracranial volume; MMSE, Mini-Mental Status Examination; RBANS, Repeatable Battery for the Assessment of Neuropsychological Status; SD, standard deviation; SEM, standard error of the mean.

Table S2. Mild AD phenotype across genotype groups defined by *APOE4* allele frequency and for *APOE4* homozygotes by the presence of *BCHE-K* alleles.

| Variable            |                                                 |                           | <b>2 <i>APOE4</i> &amp; <i>BCHE-K</i></b><br>(N = 4) | <b>2 <i>APOE4</i></b><br>(N = 10) | <b>1 <i>APOE4</i></b><br>(N = 23) | <b>No <i>APOE4</i></b><br>(N = 12) | <b>1 or 2 <i>APOE4</i></b><br>(N = 33) |
|---------------------|-------------------------------------------------|---------------------------|------------------------------------------------------|-----------------------------------|-----------------------------------|------------------------------------|----------------------------------------|
| <b>Sex</b>          | Female                                          |                           | 3<br>(75.0%)                                         | 6<br>(60.0%)                      | 12<br>(52.2%)                     | 4<br>(33.3%)                       | 18<br>(54.5%)                          |
|                     | Male                                            |                           | 1<br>(25.0%)                                         | 4<br>(40.0%)                      | 11<br>(47.8%)                     | 8<br>(66.7%)                       | 15<br>(45.5%)                          |
| <b>Onset of AD</b>  | Age-at-diagnosis<br>(yrs)                       | <b>Mean<br/>(SD, SEM)</b> | <b>60.77<br/>(4.41, 2.20)</b>                        | <b>64.16<br/>(5.38, 1.70)</b>     | <b>65.21<br/>(5.77, 1.20)</b>     | <b>63.28<br/>(7.36, 2.12)</b>      | <b>64.89<br/>(5.59, 0.97)</b>          |
|                     |                                                 | Median<br>(P25, P75)      | 61.45<br>(57.90, 63.64)                              | 63.03<br>(61.00, 67.84)           | 66.31<br>(63.10, 69.08)           | 62.72<br>(58.54, 69.31)            | 65.83<br>(62.67, 68.44)                |
|                     |                                                 | (Min, Max)                | (54.80, 65.39)                                       | (54.80, 72.79)                    | (49.04, 72.44)                    | (47.99, 74.13)                     | (49.04, 72.79)                         |
|                     | Age-at-baseline<br>(yrs)                        | <b>Mean<br/>(SD, SEM)</b> | <b>62.0<br/>(4.8, 2.4)</b>                           | <b>65.4<br/>(5.4, 1.7)</b>        | <b>66.6<br/>(5.6, 1.2)</b>        | <b>64.6<br/>(6.5, 1.9)</b>         | <b>66.2<br/>(5.5, 1.0)</b>             |
|                     |                                                 | Median<br>(P25, P75)      | 63.5<br>(59.0, 65.0)                                 | 65.0<br>(63.0, 68.0)              | 67.0<br>(63.0, 71.0)              | 66.0<br>(59.5, 70.0)               | 67.0<br>(63.0, 70.0)                   |
|                     |                                                 | (Min, Max)                | (55.0, 66.0)                                         | (55.0, 73.0)                      | (50.0, 74.0)                      | (52.0, 74.0)                       | (50.0, 74.0)                           |
|                     | Time since AD diagnosis at<br>baseline<br>(yrs) | <b>Mean<br/>(SD, SEM)</b> | <b>1.23<br/>(1.24, 0.62)</b>                         | <b>1.24<br/>(1.23, 0.39)</b>      | <b>1.40<br/>(1.27, 0.26)</b>      | <b>1.31<br/>(1.49, 0.43)</b>       | <b>1.35<br/>(1.24, 0.22)</b>           |
|                     |                                                 | Median<br>(P25, P75)      | 0.86<br>(0.41, 2.05)                                 | 0.86<br>(0.21, 1.65)              | 1.36<br>(0.52, 2.37)              | 0.96<br>(0.21, 2.30)               | 1.15<br>(0.33, 2.37)                   |
|                     |                                                 | (Min, Max)                | (0.20, 3.00)                                         | (0.16, 3.61)                      | (-1.04, 4.37)                     | (-0.63, 4.01)                      | (-1.04, 4.37)                          |
| <b>Neuroimaging</b> | Hippocampal vol., % of ICV                      | <b>Mean<br/>(SD, SEM)</b> | <b>0.26<br/>(0.05, 0.03)</b>                         | <b>0.24<br/>(0.04, 0.01)</b>      | <b>0.25<br/>(0.04, 0.01)</b>      | <b>0.28<br/>(0.03, 0.01)</b>       | <b>0.25<br/>(0.04, 0.01)</b>           |
|                     |                                                 | Median<br>(P25, P75)      | 0.28<br>(0.23, 0.29)                                 | 0.24<br>(0.23, 0.27)              | 0.25<br>(0.21, 0.27)              | 0.29<br>(0.27, 0.30)               | 0.24<br>(0.22, 0.27)                   |
|                     |                                                 | (Min, Max)                | (0.18, 0.29)                                         | (0.18, 0.29)                      | (0.17, 0.34)                      | (0.22, 0.32)                       | (0.17, 0.34)                           |
|                     | Ventricular vol., % of ICV                      | <b>Mean<br/>(SD, SEM)</b> | <b>1.77<br/>(0.73, 0.36)</b>                         | <b>1.84<br/>(0.53, 0.17)</b>      | <b>3.26<br/>(1.32, 0.28)</b>      | <b>2.66<br/>(1.08, 0.31)</b>       | 2.83<br>(1.31, 0.23)                   |
|                     |                                                 | Median<br>(P25, P75)      | 1.66<br>(1.18, 2.37)                                 | 1.81<br>(1.36, 2.23)              | 2.98<br>(2.07, 4.34)              | 2.49<br>(1.92, 3.29)               | 2.65<br>(1.94, 3.86)                   |
|                     |                                                 | (Min, Max)                | (1.12, 2.65)                                         | (1.12, 2.65)                      | (1.02, 6.20)                      | (1.07, 5.11)                       | (1.02, 6.20)                           |
| <b>CSF markers</b>  | Aβ <sub>40</sub> , pg/mL                        | <b>Mean<br/>(SD, SEM)</b> | <b>16.86</b>                                         | <b>17.11</b>                      | <b>17.64</b>                      | <b>19.18</b>                       | <b>17.48</b>                           |

Onset of Alzheimer disease in apolipoprotein ε4 carriers is earlier in butyrylcholinesterase K variant carriers

| Variable                                   | 2 APOE4 & BCHE-K<br>(N = 4) | 2 APOE4<br>(N = 10)                    | 1 APOE4<br>(N = 23)                    | No APOE4<br>(N = 12)                  | 1 or 2 APOE4<br>(N = 33)              |                                       |
|--------------------------------------------|-----------------------------|----------------------------------------|----------------------------------------|---------------------------------------|---------------------------------------|---------------------------------------|
|                                            | (2.56, 1.28)                | (1.61, 0.51)                           | (5.02, 1.05)                           | (4.19, 1.21)                          | (4.25, 0.74)                          |                                       |
|                                            | Median<br>(P25, P75)        | 16.14<br>(15.19, 18.54)                | 16.76<br>(16.54, 18.11)                | 16.54<br>(14.67, 20.99)               | 19.43<br>(16.22, 22.30)               | 16.66<br>(15.73, 19.12)               |
|                                            | (Min, Max)                  | (14.65, 20.52)                         | (14.65, 20.52)                         | (9.95, 28.40)                         | (11.99, 25.34)                        | (9.95, 28.40)                         |
| Aβ <sub>42</sub> , pg/mL                   | <b>Mean<br/>(SD, SEM)</b>   | <b>553.9<br/>(110.6, 55.3)</b>         | <b>580.7<br/>(109.6, 34.7)</b>         | <b>700.2<br/>(188.0, 39.2)</b>        | <b>799.2<br/>(179.6, 51.9)</b>        | <b>664.0<br/>(175.4, 30.5)</b>        |
|                                            | Median<br>(P25, P75)        | 555.7<br>(464.5, 643.4)                | 587.5<br>(479.8, 661.5)                | 687.1<br>(582.7, 849.7)               | 823.3<br>(638.0, 900.1)               | 661.5<br>(563.9, 773.6)               |
|                                            | (Min, Max)                  | (428.5, 675.8)                         | (428.5, 767.3)                         | (340.4, 1059.5)                       | (568.3, 1126.0)                       | (340.4, 1059.5)                       |
| Aβ <sub>42</sub> to Aβ <sub>40</sub> ratio | <b>Mean<br/>(SD, SEM)</b>   | <b>0.0342<br/>(0.0087, 0.0044)</b>     | <b>0.0342<br/>(0.0074, 0.0024)</b>     | <b>0.0399<br/>(0.0063, 0.0013)</b>    | <b>0.0426<br/>(0.0078, 0.0023)</b>    | <b>0.0382<br/>(0.0071, 0.0012)</b>    |
|                                            | Median<br>(P25, P75)        | 0.0322<br>(0.0281, 0.0402)             | 0.0338<br>(0.0259, 0.0400)             | 0.0409<br>(0.0347, 0.0446)            | 0.0458<br>(0.0357, 0.0492)            | 0.0385<br>(0.0335, 0.0438)            |
|                                            | (Min, Max)                  | (0.0259, 0.0463)                       | (0.0255, 0.0463)                       | (0.0267, 0.0504)                      | (0.0287, 0.0517)                      | (0.0255, 0.0504)                      |
| Total-tau                                  | <b>Mean<br/>(SD, SEM)</b>   | <b>333.40<br/>(99.21, 49.61)</b>       | <b>353.51<br/>(95.01, 30.04)</b>       | <b>414.17<br/>(144.58, 30.15)</b>     | <b>407.03<br/>(123.68, 35.70)</b>     | <b>395.79<br/>(133.09, 23.17)</b>     |
|                                            | Median<br>(P25, P75)        | 324.98<br>(270.03, 396.78)             | 327.60<br>(313.45, 345.10)             | 384.10<br>(290.20, 510.25)            | 395.68<br>(308.75, 486.88)            | 346.75<br>(313.45, 464.70)            |
|                                            | (Min, Max)                  | (221.05, 462.60)                       | (221.05, 566.80)                       | (212.00, 811.75)                      | (251.75, 659.30)                      | (212.00, 811.75)                      |
| p-tau <sub>181</sub> , pg/mL               | <b>Mean<br/>(SD, SEM)</b>   | <b>34.00<br/>(11.80, 5.90)</b>         | <b>35.18<br/>(9.31, 2.94)</b>          | <b>41.05<br/>(15.24, 3.18)</b>        | <b>41.27<br/>(13.79, 3.98)</b>        | <b>39.27<br/>(13.84, 2.41)</b>        |
|                                            | Median<br>(P25, P75)        | 33.99<br>(25.81, 42.19)                | 32.96<br>(31.04, 36.07)                | 39.36<br>(28.28, 53.22)               | 38.45<br>(30.01, 51.29)               | 36.03<br>(31.04, 48.31)               |
|                                            | (Min, Max)                  | (19.71, 48.31)                         | (19.71, 52.59)                         | (20.55, 81.28)                        | (23.03, 69.12)                        | (19.71, 81.28)                        |
| NfL, pg/mL                                 | <b>Mean<br/>(SD, SEM)</b>   | <b>1003.178<br/>(264.632, 132.316)</b> | <b>1038.510<br/>(319.069, 100.899)</b> | <b>1383.129<br/>(438.081, 91.346)</b> | <b>1398.905<br/>(296.255, 85.521)</b> | <b>1278.699<br/>(431.788, 75.165)</b> |
|                                            | Median<br>(P25, P75)        | 1083.989<br>(815.600, 1190.755)        | 1074.329<br>(737.715, 1167.610)        | 1395.075<br>(1091.940, 1572.575)      | 1358.548<br>(1178.445, 1615.488)      | 1192.395<br>(1000.368, 1540.230)      |
|                                            | (Min, Max)                  | (630.833, 1213.900)                    | (630.833, 1718.680)                    | (580.969, 2391.810)                   | (999.923, 1992.835)                   | (580.969, 2391.810)                   |
| Ng, pg/mL                                  | <b>Mean<br/>(SD, SEM)</b>   | <b>493.087<br/>(187.517, 93.759)</b>   | <b>481.615<br/>(119.604, 37.822)</b>   | <b>546.251<br/>(270.939, 56.495)</b>  | <b>525.671<br/>(235.097, 67.867)</b>  | <b>526.664<br/>(235.375, 40.973)</b>  |
|                                            | Median<br>(P25, P75)        | 450.454<br>(347.242, 638.931)          | 472.203<br>(369.620, 538.994)          | 479.523<br>(307.055, 684.491)         | 460.332<br>(338.809, 696.191)         | 474.233<br>(369.620, 582.299)         |

| Variable  |                                       | 2 APOE4 & BCHE-K<br>(N = 4) | 2 APOE4<br>(N = 10)                    | 1 APOE4<br>(N = 23)                    | No APOE4<br>(N = 12)                    | 1 or 2 APOE4<br>(N = 33)                |                                         |
|-----------|---------------------------------------|-----------------------------|----------------------------------------|----------------------------------------|-----------------------------------------|-----------------------------------------|-----------------------------------------|
|           |                                       | (Min, Max)                  | (332.570, 738.869)                     | (332.570, 738.869)                     | (194.618, 1306.915)                     | (237.776, 1013.229)                     | (194.618, 1306.915)                     |
|           | YKL-40, pg/mL                         | <b>Mean<br/>(SD, SEM)</b>   | <b>190012.7<br/>(86035.8, 43017.9)</b> | <b>201544.9<br/>(63834.1, 20186.1)</b> | <b>267090.9<br/>(114893.9, 23957.0)</b> | <b>317581.8<br/>(161891.7, 46734.1)</b> | <b>247228.5<br/>(105627.6, 18387.4)</b> |
|           |                                       | Median<br>(P25, P75)        | 183250.8<br>(122271.6, 257753.8)       | 223078.0<br>(145792.5, 242007.5)       | 252314.0<br>(197204.5, 321401.5)        | 256480.3<br>(204270.8, 433662.3)        | 235441.5<br>(189715.0, 294798.5)        |
|           |                                       | (Min, Max)                  | (98750.8, 294798.5)                    | (98750.8, 294798.5)                    | (125213.5, 598333.5)                    | (131158.5, 662666.5)                    | (98750.8, 598333.5)                     |
| Cognition | MMSE Total<br>(0-30)                  | <b>Mean<br/>(SD, SEM)</b>   | <b>24.3<br/>(2.5, 1.3)</b>             | <b>24.4<br/>(2.1, 0.7)</b>             | <b>23.3<br/>(2.3, 0.5)</b>              | <b>23.7<br/>(2.2, 0.6)</b>              | <b>23.6<br/>(2.3, 0.4)</b>              |
|           |                                       | Median<br>(P25, P75)        | 24.5<br>(22.5, 26.0)                   | 24.5<br>(23.0, 26.0)                   | 23.0<br>(21.0, 25.0)                    | 23.5<br>(21.5, 26.0)                    | 24.0<br>(22.0, 26.0)                    |
|           |                                       | (Min, Max)                  | (21.0, 27.0)                           | (21.0, 27.0)                           | (20.0, 27.0)                            | (21.0, 26.0)                            | (20.0, 27.0)                            |
|           | MMSE Memory<br>(0-6)                  | <b>Mean<br/>(SD, SEM)</b>   | <b>4.0<br/>(1.4, 0.7)</b>              | <b>4.1<br/>(1.0, 0.3)</b>              | <b>4.0<br/>(1.1, 0.2)</b>               | <b>4.6<br/>(1.2, 0.4)</b>               | <b>4.1<br/>(1.1, 0.2)</b>               |
|           |                                       | Median<br>(P25, P75)        | 3.5<br>(3.0, 5.0)                      | 4.0<br>(3.0, 5.0)                      | 4.0<br>(3.0, 4.0)                       | 4.5<br>(3.5, 6.0)                       | 4.0<br>(3.0, 4.0)                       |
|           |                                       | (Min, Max)                  | (3.0, 6.0)                             | (3.0, 6.0)                             | (2.0, 6.0)                              | (3.0, 6.0)                              | (2.0, 6.0)                              |
|           | MMSE Visual Construction<br>(0-1)     | <b>Mean<br/>(SD, SEM)</b>   | <b>0.8<br/>(0.5, 0.3)</b>              | <b>0.8<br/>(0.4, 0.1)</b>              | <b>0.7<br/>(0.5, 0.1)</b>               | <b>0.5<br/>(0.5, 0.2)</b>               | <b>0.7<br/>(0.5, 0.1)</b>               |
|           |                                       | Median<br>(P25, P75)        | 1.0<br>(0.5, 1.0)                      | 1.0<br>(1.0, 1.0)                      | 1.0<br>(0.0, 1.0)                       | 0.5<br>(0.0, 1.0)                       | 1.0<br>(0.0, 1.0)                       |
|           |                                       | (Min, Max)                  | (0.0, 1.0)                             | (0.0, 1.0)                             | (0.0, 1.0)                              | (0.0, 1.0)                              | (0.0, 1.0)                              |
|           | RBANS Total<br>(40-160)               | <b>Mean<br/>(SD, SEM)</b>   | <b>72.8<br/>(8.3, 4.2)</b>             | <b>73.4<br/>(10.5, 3.3)</b>            | <b>64.0<br/>(11.2, 2.3)</b>             | <b>68.5<br/>(12.3, 3.5)</b>             | <b>66.8<br/>(11.7, 2.0)</b>             |
|           |                                       | Median<br>(P25, P75)        | 75.0<br>(67.0, 78.5)                   | 78.0<br>(61.0, 80.0)                   | 61.0<br>(54.0, 73.0)                    | 67.5<br>(61.5, 78.5)                    | 66.0<br>(57.0, 77.0)                    |
|           |                                       | (Min, Max)                  | (61.0, 80.0)                           | (57.0, 85.0)                           | (49.0, 88.0)                            | (49.0, 90.0)                            | (49.0, 88.0)                            |
|           | RBANS Delayed Memory<br>(40-154)      | <b>Mean<br/>(SD, SEM)</b>   | <b>56.0<br/>(19.3, 9.7)</b>            | <b>52.8<br/>(12.5, 3.9)</b>            | <b>48.0<br/>(7.4, 1.6)</b>              | <b>66.3<br/>(22.5, 6.5)</b>             | <b>49.5<br/>(9.3, 1.6)</b>              |
|           |                                       | Median<br>(P25, P75)        | 50.0<br>(44.0, 68.0)                   | 50.0<br>(44.0, 56.0)                   | 48.0<br>(44.0, 48.0)                    | 60.0<br>(48.0, 91.5)                    | 48.0<br>(44.0, 52.0)                    |
|           |                                       | (Min, Max)                  | (40.0, 84.0)                           | (40.0, 84.0)                           | (40.0, 68.0)                            | (40.0, 102.0)                           | (40.0, 84.0)                            |
|           | RBANS Visuospatial/<br>Constructional | <b>Mean<br/>(SD, SEM)</b>   | <b>101.8<br/>(28.8, 14.4)</b>          | <b>100.8<br/>(20.0, 6.3)</b>           | <b>81.1<br/>(19.8, 4.1)</b>             | <b>79.9<br/>(21.7, 6.3)</b>             | <b>87.1<br/>(21.6, 3.8)</b>             |

Onset of Alzheimer disease in apolipoprotein ε4 carriers is earlier in butyrylcholinesterase K variant carriers

| Variable |                      | <b>2 APOE4 &amp; BCHE-K<br/>(N = 4)</b> | <b>2 APOE4<br/>(N = 10)</b> | <b>1 APOE4<br/>(N = 23)</b> | <b>No APOE4<br/>(N = 12)</b> | <b>1 or 2 APOE4<br/>(N = 33)</b> |
|----------|----------------------|-----------------------------------------|-----------------------------|-----------------------------|------------------------------|----------------------------------|
| (40-154) | Median<br>(P25, P75) | 113.0<br>(82.5, 121.0)                  | 102.5<br>(84.0, 121.0)      | 78.0<br>(64.0, 105.0)       | 79.5<br>(61.0, 99.0)         | 84.0<br>(69.0, 105.0)            |
|          | (Min, Max)           | (60.0, 121.0)                           | (60.0, 121.0)               | (50.0, 126.0)               | (50.0, 116.0)                | (50.0, 126.0)                    |

ICV, intracranial volume; MMSE, Mini-Mental Status Examination; RBANS, Repeatable Battery for the Assessment of Neuropsychological Status; SD, standard deviation; SEM, standard error of the mean.



Table S3. Mild AD phenotype across genotype groups defined by *APOE4* and *BCHE-K* carrier status.

| Variable            |                                                 |                           | <i>APOE4</i> & <i>BCHE-K</i><br>(N = 11) | <i>APOE4</i> & No- <i>BCHE-K</i><br>(N = 22) | No- <i>APOE4</i> & <i>BCHE-K</i><br>(N = 5) | No- <i>APOE4</i> & No- <i>BCHE-K</i><br>(N = 7) |
|---------------------|-------------------------------------------------|---------------------------|------------------------------------------|----------------------------------------------|---------------------------------------------|-------------------------------------------------|
| <b>Sex</b>          | Female                                          |                           | 7<br>(63.6%)                             | 11<br>(50.0%)                                | 2<br>(40.0%)                                | 2<br>(28.6%)                                    |
|                     | Male                                            |                           | 4<br>(36.4%)                             | 11<br>(50.0%)                                | 3<br>(60.0%)                                | 5<br>(71.4%)                                    |
| <b>Onset of AD</b>  | Age-at-diagnosis<br>(yrs)                       | <b>Mean<br/>(SD, SEM)</b> | <b>60.61<br/>(6.08, 1.83)</b>            | <b>67.03<br/>(3.96, 0.84)</b>                | <b>63.88<br/>(7.58, 3.39)</b>               | <b>62.84<br/>(7.78, 2.94)</b>                   |
|                     |                                                 | Median<br>(P25, P75)      | 61.89<br>(54.80, 65.83)                  | 67.16<br>(64.04, 70.63)                      | 61.28<br>(57.92, 69.41)                     | 63.00<br>(59.16, 69.21)                         |
|                     |                                                 | (Min, Max)                | (49.04, 68.44)                           | (59.37, 72.79)                               | (56.69, 74.13)                              | (47.99, 71.45)                                  |
|                     | Age-at-baseline<br>(yrs)                        | <b>Mean<br/>(SD, SEM)</b> | <b>62.1<br/>(5.9, 1.8)</b>               | <b>68.3<br/>(4.0, 0.9)</b>                   | <b>64.8<br/>(7.3, 3.2)</b>                  | <b>64.4<br/>(6.6, 2.5)</b>                      |
|                     |                                                 | Median<br>(P25, P75)      | 63.0<br>(59.0, 67.0)                     | 68.0<br>(66.0, 72.0)                         | 62.0<br>(59.0, 71.0)                        | 66.0<br>(60.0, 69.0)                            |
|                     |                                                 | (Min, Max)                | (50.0, 69.0)                             | (62.0, 74.0)                                 | (58.0, 74.0)                                | (52.0, 72.0)                                    |
|                     | Time since AD diagnosis at<br>baseline<br>(yrs) | <b>Mean<br/>(SD, SEM)</b> | <b>1.48<br/>(1.34, 0.40)</b>             | <b>1.28<br/>(1.21, 0.26)</b>                 | <b>0.92<br/>(0.67, 0.30)</b>                | <b>1.59<br/>(1.89, 0.72)</b>                    |
|                     |                                                 | Median<br>(P25, P75)      | 0.96<br>(0.56, 2.40)                     | 1.45<br>(0.21, 2.37)                         | 1.08<br>(0.72, 1.31)                        | 0.84<br>(-0.21, 3.55)                           |
|                     |                                                 | (Min, Max)                | (0.20, 4.37)                             | (-1.04, 3.61)                                | (-0.13, 1.59)                               | (-0.63, 4.01)                                   |
| <b>Neuroimaging</b> | Hippocampal vol., % of ICV                      | <b>Mean<br/>(SD, SEM)</b> | <b>0.26<br/>(0.05, 0.01)</b>             | <b>0.24<br/>(0.03, 0.01)</b>                 | <b>0.28<br/>(0.02, 0.01)</b>                | <b>0.28<br/>(0.03, 0.01)</b>                    |
|                     |                                                 | Median<br>(P25, P75)      | 0.27<br>(0.24, 0.29)                     | 0.24<br>(0.21, 0.25)                         | 0.29<br>(0.27, 0.30)                        | 0.28<br>(0.27, 0.30)                            |
|                     |                                                 | (Min, Max)                | (0.17, 0.33)                             | (0.19, 0.34)                                 | (0.25, 0.31)                                | (0.22, 0.32)                                    |
|                     | Ventricular vol., % of ICV                      | <b>Mean<br/>(SD, SEM)</b> | <b>2.91<br/>(1.54, 0.46)</b>             | <b>2.79<br/>(1.23, 0.26)</b>                 | <b>2.30<br/>(0.97, 0.44)</b>                | <b>2.91<br/>(1.15, 0.44)</b>                    |
|                     |                                                 | Median<br>(P25, P75)      | 2.65<br>(1.86, 3.86)                     | 2.59<br>(1.94, 3.61)                         | 2.12<br>(1.75, 3.26)                        | 2.87<br>(1.93, 3.49)                            |
|                     |                                                 | (Min, Max)                | (1.12, 6.20)                             | (1.02, 5.02)                                 | (1.07, 3.31)                                | (1.92, 5.11)                                    |
| <b>CSF markers</b>  | Aβ <sub>40</sub> , pg/mL                        | <b>Mean<br/>(SD, SEM)</b> | <b>16.32<br/>(3.20, 0.96)</b>            | <b>18.06<br/>(4.65, 0.99)</b>                | <b>19.91<br/>(4.68, 2.09)</b>               | <b>18.67<br/>(4.11, 1.55)</b>                   |

| Variable                             | <i>APOE4 &amp; BCHE-K</i><br>(N = 11) | <i>APOE4 &amp; No-BCHE-K</i><br>(N = 22) | No- <i>APOE4 &amp; BCHE-K</i><br>(N = 5) | No- <i>APOE4 &amp; No-BCHE-K</i><br>(N = 7) |                                        |
|--------------------------------------|---------------------------------------|------------------------------------------|------------------------------------------|---------------------------------------------|----------------------------------------|
| $A\beta_{42}$ , pg/mL                | Median<br>(P25, P75)                  | 16.00<br>(14.65, 19.54)                  | 16.90<br>(16.31, 19.12)                  | 21.87<br>(19.44, 22.74)                     | 18.50<br>(14.76, 21.79)                |
|                                      | (Min, Max)                            | (9.95, 20.99)                            | (10.73, 28.40)                           | (11.99, 23.52)                              | (13.18, 25.34)                         |
|                                      | <b>Mean<br/>(SD, SEM)</b>             | <b>640.5<br/>(138.6, 41.8)</b>           | <b>675.7<br/>(193.2, 41.2)</b>           | <b>754.5<br/>(194.7, 87.1)</b>              | <b>831.2<br/>(176.1, 66.6)</b>         |
| $A\beta_{42}$ to $A\beta_{40}$ ratio | Median<br>(P25, P75)                  | 642.3<br>(500.4, 804.8)                  | 661.5<br>(563.9, 773.6)                  | 669.3<br>(628.3, 867.7)                     | 845.8<br>(647.7, 917.2)                |
|                                      | (Min, Max)                            | (428.5, 849.7)                           | (340.4, 1059.5)                          | (568.3, 1039.0)                             | (598.1, 1126.0)                        |
|                                      | <b>Mean<br/>(SD, SEM)</b>             | <b>0.0406<br/>(0.0077, 0.0023)</b>       | <b>0.0369<br/>(0.0066, 0.0014)</b>       | <b>0.0387<br/>(0.0079, 0.0036)</b>          | <b>0.0453<br/>(0.0071, 0.0027)</b>     |
| Total-tau                            | Median<br>(P25, P75)                  | 0.0438<br>(0.0341, 0.0463)               | 0.0365<br>(0.0331, 0.0423)               | 0.0370<br>(0.0344, 0.0461)                  | 0.0489<br>(0.0405, 0.0496)             |
|                                      | (Min, Max)                            | (0.0259, 0.0504)                         | (0.0255, 0.0501)                         | (0.0287, 0.0475)                            | (0.0316, 0.0517)                       |
|                                      | <b>Mean<br/>(SD, SEM)</b>             | <b>389.88<br/>(98.91, 29.82)</b>         | <b>398.74<br/>(149.34, 31.84)</b>        | <b>416.37<br/>(139.51, 62.39)</b>           | <b>400.36<br/>(122.24, 46.20)</b>      |
| p-tau <sub>181</sub> , pg/mL         | Median<br>(P25, P75)                  | 371.30<br>(319.00, 464.70)               | 344.03<br>(309.40, 510.25)               | 449.70<br>(290.75, 524.05)                  | 392.35<br>(326.75, 405.05)             |
|                                      | (Min, Max)                            | (221.05, 556.10)                         | (212.00, 811.75)                         | (251.75, 565.60)                            | (290.20, 659.30)                       |
|                                      | <b>Mean<br/>(SD, SEM)</b>             | <b>40.39<br/>(12.21, 3.68)</b>           | <b>38.71<br/>(14.83, 3.16)</b>           | <b>42.52<br/>(15.76, 7.05)</b>              | <b>40.37<br/>(13.46, 5.09)</b>         |
| NfL, pg/mL                           | Median<br>(P25, P75)                  | 38.56<br>(31.91, 48.31)                  | 33.06<br>(28.28, 50.94)                  | 46.53<br>(29.15, 56.05)                     | 36.99<br>(30.87, 41.36)                |
|                                      | (Min, Max)                            | (19.71, 63.98)                           | (20.55, 81.28)                           | (23.03, 57.86)                              | (28.79, 69.12)                         |
|                                      | <b>Mean<br/>(SD, SEM)</b>             | <b>1391.727<br/>(498.369, 150.264)</b>   | <b>1222.185<br/>(394.703, 84.151)</b>    | <b>1316.283<br/>(159.506, 71.333)</b>       | <b>1457.920<br/>(366.323, 138.457)</b> |
| Ng, pg/mL                            | Median<br>(P25, P75)                  | 1213.900<br>(1036.835, 1850.245)         | 1177.855<br>(868.289, 1488.770)          | 1296.260<br>(1245.680, 1391.300)            | 1440.645<br>(1042.665, 1709.570)       |
|                                      | (Min, Max)                            | (630.833, 2391.810)                      | (580.969, 2223.485)                      | (1111.210, 1536.965)                        | (999.923, 1992.835)                    |
|                                      | <b>Mean<br/>(SD, SEM)</b>             | <b>567.892<br/>(188.029, 56.693)</b>     | <b>506.050<br/>(257.391, 54.876)</b>     | <b>540.495<br/>(244.553, 109.367)</b>       | <b>515.083<br/>(247.274, 93.461)</b>   |
|                                      | Median<br>(P25, P75)                  | 538.994<br>(422.006, 738.869)            | 471.601<br>(307.055, 562.083)            | 543.664<br>(362.283, 750.315)               | 440.584<br>(315.335, 642.066)          |
|                                      | (Min, Max)                            | (332.570, 905.365)                       | (194.618, 1306.915)                      | (237.776, 808.435)                          | (302.237, 1013.229)                    |

| Variable         |                                                   | <i>APOE4 &amp; BCHE-K</i><br>(N = 11)         | <i>APOE4 &amp; No-BCHE-K</i><br>(N = 22)     | <i>No-APOE4 &amp; BCHE-K</i><br>(N = 5)       | <i>No-APOE4 &amp; No-BCHE-K</i><br>(N = 7)    |                                   |
|------------------|---------------------------------------------------|-----------------------------------------------|----------------------------------------------|-----------------------------------------------|-----------------------------------------------|-----------------------------------|
| YKL-40, pg/mL    | <b>Mean</b><br>(SD, SEM)                          | <b>247158.4</b><br><b>(143270.3, 43197.6)</b> | <b>247263.5</b><br><b>(85011.5, 18124.5)</b> | <b>351304.4</b><br><b>(164534.1, 73581.9)</b> | <b>293494.2</b><br><b>(168456.1, 63670.4)</b> |                                   |
|                  | Median<br>(P25, P75)                              | 206109.0<br>(145792.5, 294798.5)              | 239475.3<br>(197204.5, 300613.0)             | 380182.0<br>(239378.0, 487142.5)              | 235319.5<br>(202933.5, 300130.5)              |                                   |
|                  | (Min, Max)                                        | (98750.8, 598333.5)                           | (112021.5, 487722.0)                         | (131158.5, 518661.0)                          | (174219.0, 662666.5)                          |                                   |
|                  |                                                   |                                               |                                              |                                               |                                               |                                   |
| <b>Cognition</b> | MMSE Total<br>(0-30)                              | <b>Mean</b><br>(SD, SEM)                      | <b>23.8</b><br><b>(2.5, 0.7)</b>             | <b>23.5</b><br><b>(2.3, 0.5)</b>              | <b>23.4</b><br><b>(2.4, 1.1)</b>              | <b>23.9</b><br><b>(2.3, 0.9)</b>  |
|                  |                                                   | Median<br>(P25, P75)                          | 25.0<br>(21.0, 26.0)                         | 23.0<br>(22.0, 26.0)                          | 22.0<br>(22.0, 26.0)                          | 24.0<br>(21.0, 26.0)              |
|                  |                                                   | (Min, Max)                                    | (20.0, 27.0)                                 | (20.0, 27.0)                                  | (21.0, 26.0)                                  | (21.0, 26.0)                      |
|                  |                                                   |                                               |                                              |                                               |                                               |                                   |
|                  | MMSE Memory<br>(0-6)                              | <b>Mean</b><br>(SD, SEM)                      | <b>3.9</b><br><b>(1.0, 0.3)</b>              | <b>4.1</b><br><b>(1.1, 0.2)</b>               | <b>4.2</b><br><b>(1.3, 0.6)</b>               | <b>4.9</b><br><b>(1.2, 0.5)</b>   |
|                  |                                                   | Median<br>(P25, P75)                          | 4.0<br>(3.0, 4.0)                            | 4.0<br>(3.0, 5.0)                             | 4.0<br>(3.0, 5.0)                             | 5.0<br>(4.0, 6.0)                 |
|                  |                                                   | (Min, Max)                                    | (2.0, 6.0)                                   | (3.0, 6.0)                                    | (3.0, 6.0)                                    | (3.0, 6.0)                        |
|                  |                                                   |                                               |                                              |                                               |                                               |                                   |
|                  | MMSE Visual Construction<br>(0-1)                 | <b>Mean</b><br>(SD, SEM)                      | <b>0.7</b><br><b>(0.5, 0.1)</b>              | <b>0.7</b><br><b>(0.5, 0.1)</b>               | <b>0.8</b><br><b>(0.4, 0.2)</b>               | <b>0.3</b><br><b>(0.5, 0.2)</b>   |
|                  |                                                   | Median<br>(P25, P75)                          | 1.0<br>(0.0, 1.0)                            | 1.0<br>(0.0, 1.0)                             | 1.0<br>(1.0, 1.0)                             | 0.0<br>(0.0, 1.0)                 |
|                  |                                                   | (Min, Max)                                    | (0.0, 1.0)                                   | (0.0, 1.0)                                    | (0.0, 1.0)                                    | (0.0, 1.0)                        |
|                  |                                                   |                                               |                                              |                                               |                                               |                                   |
|                  | RBANS Total<br>(40-160)                           | <b>Mean</b><br>(SD, SEM)                      | <b>65.5</b><br><b>(10.5, 3.2)</b>            | <b>67.5</b><br><b>(12.4, 2.6)</b>             | <b>72.0</b><br><b>(13.4, 6.0)</b>             | <b>66.0</b><br><b>(11.8, 4.5)</b> |
|                  |                                                   | Median<br>(P25, P75)                          | 64.0<br>(55.0, 77.0)                         | 68.5<br>(57.0, 79.0)                          | 77.0<br>(72.0, 80.0)                          | 62.0<br>(61.0, 68.0)              |
|                  |                                                   | (Min, Max)                                    | (51.0, 80.0)                                 | (49.0, 88.0)                                  | (49.0, 82.0)                                  | (52.0, 90.0)                      |
|                  |                                                   |                                               |                                              |                                               |                                               |                                   |
|                  | RBANS Delayed Memory<br>(40-154)                  | <b>Mean</b><br>(SD, SEM)                      | <b>52.7</b><br><b>(13.7, 4.1)</b>            | <b>47.8</b><br><b>(5.9, 1.2)</b>              | <b>69.0</b><br><b>(26.2, 11.7)</b>            | <b>64.3</b><br><b>(21.5, 8.1)</b> |
|                  |                                                   | Median<br>(P25, P75)                          | 48.0<br>(44.0, 64.0)                         | 48.0<br>(44.0, 52.0)                          | 56.0<br>(56.0, 91.0)                          | 64.0<br>(48.0, 92.0)              |
|                  |                                                   | (Min, Max)                                    | (40.0, 84.0)                                 | (40.0, 60.0)                                  | (40.0, 102.0)                                 | (40.0, 94.0)                      |
|                  |                                                   |                                               |                                              |                                               |                                               |                                   |
|                  | RBANS Visuospatial/<br>Constructional<br>(40-154) | <b>Mean</b><br>(SD, SEM)                      | <b>90.4</b><br><b>(25.6, 7.7)</b>            | <b>85.4</b><br><b>(19.8, 4.2)</b>             | <b>79.4</b><br><b>(21.1, 9.4)</b>             | <b>80.3</b><br><b>(23.9, 9.0)</b> |
|                  |                                                   | Median<br>(P25, P75)                          | 78.0                                         | 84.0                                          | 78.0                                          | 81.0                              |

Onset of Alzheimer disease in apolipoprotein ε4 carriers is earlier in butyrylcholinesterase K variant carriers

| Variable                           |                           | <i>APOE4 &amp; BCHE-K</i><br>(N = 11) | <i>APOE4 &amp; No-BCHE-K</i><br>(N = 22) | <i>No-APOE4 &amp; BCHE-K</i><br>(N = 5) | <i>No-APOE4 &amp; No-BCHE-K</i><br>(N = 7) |
|------------------------------------|---------------------------|---------------------------------------|------------------------------------------|-----------------------------------------|--------------------------------------------|
|                                    | (Min, Max)                | (64.0, 121.0)                         | (69.0, 105.0)                            | (62.0, 96.0)                            | (60.0, 102.0)                              |
|                                    | (Min, Max)                | (60.0, 126.0)                         | (50.0, 121.0)                            | (56.0, 105.0)                           | (50.0, 116.0)                              |
| RBANS Immediate Memory<br>(40-154) | <b>Mean<br/>(SD, SEM)</b> | <b>58.6<br/>(12.3, 3.7)</b>           | <b>69.5<br/>(16.3, 3.5)</b>              | <b>71.4<br/>(23.8, 10.6)</b>            | <b>64.0<br/>(11.9, 4.5)</b>                |
|                                    | Median<br>(P25, P75)      | 57.0<br>(49.0, 69.0)                  | 67.0<br>(57.0, 81.0)                     | 73.0<br>(57.0, 87.0)                    | 57.0<br>(53.0, 78.0)                       |
|                                    | (Min, Max)                | (40.0, 73.0)                          | (44.0, 103.0)                            | (40.0, 100.0)                           | (53.0, 81.0)                               |
| RBANS Language<br>(40-154)         | <b>Mean<br/>(SD, SEM)</b> | <b>88.5<br/>(10.6, 3.2)</b>           | <b>88.1<br/>(13.3, 2.8)</b>              | <b>87.6<br/>(6.0, 2.7)</b>              | <b>84.0<br/>(16.7, 6.3)</b>                |
|                                    | Median<br>(P25, P75)      | 90.0<br>(82.0, 94.0)                  | 92.0<br>(83.0, 96.0)                     | 85.0<br>(84.0, 90.0)                    | 87.0<br>(64.0, 99.0)                       |
|                                    | (Min, Max)                | (71.0, 108.0)                         | (51.0, 104.0)                            | (82.0, 97.0)                            | (60.0, 104.0)                              |
| RBANS Attention<br>(40-154)        | <b>Mean<br/>(SD, SEM)</b> | <b>72.6<br/>(14.3, 4.3)</b>           | <b>79.5<br/>(16.6, 3.5)</b>              | <b>78.4<br/>(15.4, 6.9)</b>             | <b>71.9<br/>(8.1, 3.1)</b>                 |
|                                    | Median<br>(P25, P75)      | 72.0<br>(68.0, 85.0)                  | 79.0<br>(64.0, 91.0)                     | 85.0<br>(75.0, 88.0)                    | 72.0<br>(64.0, 75.0)                       |
|                                    | (Min, Max)                | (49.0, 100.0)                         | (53.0, 118.0)                            | (53.0, 91.0)                            | (60.0, 85.0)                               |

ICV, intracranial volume; MMSE, Mini-Mental Status Examination; RBANS, Repeatable Battery for the Assessment of Neuropsychological Status; SD, standard deviation; SEM, standard error of the mean.

Onset of Alzheimer disease in apolipoprotein ε4 carriers is earlier in butyrylcholinesterase K variant carriers

Figure S1. Correlations in the overall population and in *APOE4* and *BCHE-K* subgroups of Ng versus YKL-40.

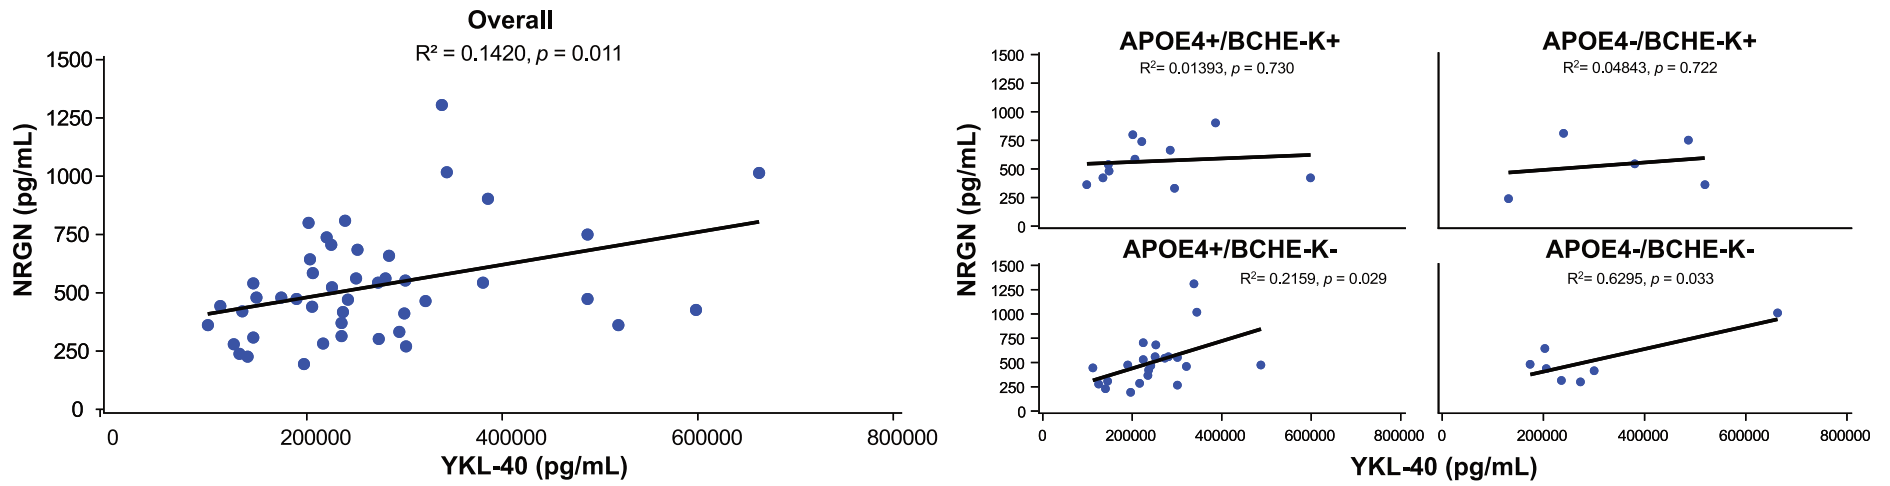

Onset of Alzheimer disease in apolipoprotein ε4 carriers is earlier in butyrylcholinesterase K variant carriers

### Ethics committees approving clinical study

| Principal Investigator   | IRB/Ethic Committee                                                                               | Reference number    |
|--------------------------|---------------------------------------------------------------------------------------------------|---------------------|
| Dr Albert Ludolph        | Ethikkommission der Universität Ulm                                                               | 412/16              |
| Dr Siegfried Muhlack     | Ethik-Kommission der Ruhr-Universität Bochum                                                      | 16-5929             |
| Dr Catherine Mummery     | London-Central Research Ethics Committee Manchester HRA Centre                                    | 17/LO/0440          |
| Dr Simon Ducharme        | MUHC Neurosciences Research Ethics Board                                                          | 2017-3206           |
| Dr Juha Rinne            | National Committee on Medical Research Ethics                                                     | 73/06.00.01/2017    |
| Dr Ralf Bodenschatz      | Ethikkommission der Sächsischen Landesärztekammer                                                 | EK-AMG-MCB-155/16-1 |
| Dr Peter Paul de Deyn    | Central Committee on Research Involving Human Subjects                                            | NL60032.000.16      |
| Dr Anne Borjesson Hansen | Regionala etikprövningsnämnden i Stockholm Karolinska Institutet i Solna                          | 2017/300-31         |
| Dr Michael Jonsson       | Regionala etikprövningsnämnden i Stockholm Karolinska Institutet i Solna                          | 2017/300-31         |
| Dr Daniel Blackburn      | London-Central Research Ethics Committee Manchester HRA Centre                                    | 17/LO/0440          |
| Dr Anja Schneider        | Ethikkommission an der Medizinischen Fakultät der Rheinischen Friedrich-Wilhelms-Universität Bonn | 035/18-AMG          |
| Dr Phillipus Scheltens   | Central Committee on Research Involving Human Subjects                                            | NL60032.000.16      |
